# Supplementary material
Source: Springer Nature journal article supplement (https://www.springermedizin.de/resource/supplementary/12876_2010_499_MOESM1_ESM.pdf/9436852)
Supplement: MOESM1 [file 9436852]

# Dietary aromatic compounds

**Gut  
Microbiota**

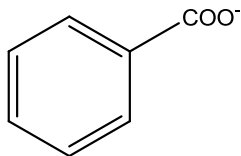

**Benzoate**

Occurring naturally  
(eg. in berries)  
and as a food preservative

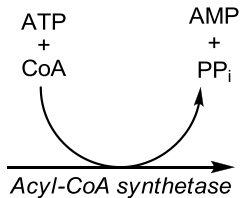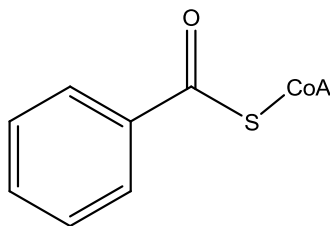

**Benzoyl CoA**

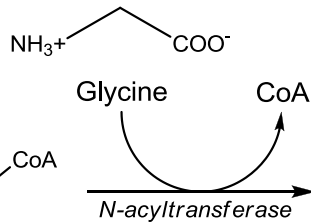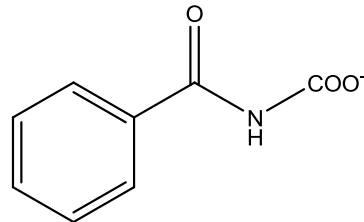

**Hippurate**
